# Supplementary material
Source: PubMed Central journal article supplement (PMC2926290)
Supplement: NIHMS200970-supplement-01.pdf [file NIHMS200970-supplement-01.pdf]

**Table S1:** CKD-EPI and MDRD Study Equations for Estimating GFR Expressed for Specified Race, Sex, and SCr

| Race                                 | Sex    | SCr (mg/dL) | Equation                                                                  |
|--------------------------------------|--------|-------------|---------------------------------------------------------------------------|
| <b><u>CKD-EPI Study Equation</u></b> |        |             |                                                                           |
| Black                                | Female | ≤ 0.7       | GFR = 166 × (SCr/0.7) <sup>-0.329</sup> × (0.993) <sup>Age</sup>          |
| Black                                | Female | > 0.7       | GFR = 166 × (SCr/0.7) <sup>-1.209</sup> × (0.993) <sup>Age</sup>          |
| Black                                | Male   | ≤ 0.9       | GFR = 163 × (SCr/0.9) <sup>-0.411</sup> × (0.993) <sup>Age</sup>          |
| Black                                | Male   | > 0.9       | GFR = 163 × (SCr/0.9) <sup>-1.209</sup> × (0.993) <sup>Age</sup>          |
| White or other                       | Female | ≤ 0.7       | GFR = 144 × (SCr/0.7) <sup>-0.329</sup> × (0.993) <sup>Age</sup>          |
| White or other                       | Female | > 0.7       | GFR = 144 × (SCr/0.7) <sup>-1.209</sup> × (0.993) <sup>Age</sup>          |
| White or other                       | Male   | ≤ 0.9       | GFR = 141 × (SCr/0.9) <sup>-0.411</sup> × (0.993) <sup>Age</sup>          |
| White or other                       | Male   | > 0.9       | GFR = 141 × (SCr/0.9) <sup>-1.209</sup> × (0.993) <sup>Age</sup>          |
| <b><u>MDRD Study Equation</u></b>    |        |             |                                                                           |
| Black                                | Female | all         | GFR = 175 × SCr <sup>-1.154</sup> × age <sup>-0.203</sup> × 1.212 × 0.742 |
| Black                                | Male   | all         | GFR = 175 × SCr <sup>-1.154</sup> × age <sup>-0.203</sup> × 1.212         |
| White or other                       | Female | all         | GFR = 175 × SCr <sup>-1.154</sup> × age <sup>-0.203</sup> × 0.742         |
| White or other                       | Male   | all         | GFR = 175 × SCr <sup>-1.154</sup> × age <sup>-0.203</sup>                 |

CKD-EPI equation expressed as a single equation:  $GFR = 141 \times \min(SCr/\kappa, 1)^\alpha \times \max(SCr/\kappa, 1)^{-1.209} \times 0.993^{Age} \times 1.018$  [if female]  $\times 1.159$  [if black] where SCr is serum creatinine,  $\kappa$  is 0.7 for females and 0.9 for males,  $\alpha$  is -0.329 for females and -0.411 for males, min indicates the minimum of SCr/ $\kappa$  or 1, and max indicates the maximum of SCr/ $\kappa$  or 1.

MDRD Study equation expressed as a single equation:  $GFR = 175 \times \text{standardized SCr}^{-1.154} \times \text{age}^{-0.203} \times 1.212$  [if black]  $\times 0.742$  [if female], where SCr is serum creatinine

Conversion factors for units: GFR in mL/min/1.73 m<sup>2</sup> to mL/s/1.73 m<sup>2</sup>,  $\times 0.0167$ ; SCr in mg/dL to  $\mu\text{mol/L}$ ,  $\times 88.4$ .

Abbreviations: CKD-EPI, Chronic Kidney Disease Epidemiology Collaboration; GFR, glomerular filtration rate; MDRD, Modification of Diet in Renal Disease; SCr, serum creatinine.
