# Supplementary material
Source: PubMed Central journal article supplement (PMC2926290)
Supplement: NIHMS200970-supplement-02.pdf [file NIHMS200970-supplement-02.pdf]

**Table S2:** Comparison of bias of the CKD-EPI and MDRD Study equations by clinical characteristics subgroups

| Group                    |                | Equation | Overall |      |             | eGFR<60 |      |            | eGFR 60-90 |      |               | eGFR >90 |       |              |
|--------------------------|----------------|----------|---------|------|-------------|---------|------|------------|------------|------|---------------|----------|-------|--------------|
|                          |                |          | No.     | Bias | CI          | No.     | Bias | CI         | No.        | Bias | CI            | No.      | Bias  | CI           |
| Overall                  |                | CKD-EPI  | 3896    | 2.2  | (1.8,2.6)   | 1902    | 1.9  | (1.4,2.2)  | 990        | 4.2  | (3.2,5.5)     | 1004     | 0.9   | (0.8,2.8)    |
|                          |                | MDRD     | 3896    | 5.4  | (5.0,5.9)   | 2100    | 3.4  | (2.9,4.0)  | 1124       | 11.9 | (11.0,13.0)   | 672      | 6.4   | (4.4,9.0)    |
| Age                      | <40            | CKD-EPI  | 1136    | 2.1  | (0.9,3.4)   | 256     | 1.6  | (0.3,2.3)  | 260        | 4.9  | (2.6,7.5)     | 620      | 0.9   | (-1.2,4.4)   |
|                          | 40-65          |          | 2192    | 2.5  | (2.0,3.1)   | 1170    | 2.2  | (1.6,2.7)  | 645        | 4.5  | (3.3,5.8)     | 377      | 1.0   | (-1.2,2.8)   |
|                          | >65            |          | 568     | 1.3  | (0.6,2.0)   | 476     | 1.3  | (0.6,2.0)  | 85         | 0.7  | (-1.6,6.5)    | 7        | 0.6   | (-33.4,15.7) |
|                          | <40            | MDRD     | 1136    | 9.7  | (8.3,10.8)  | 309     | 4.9  | (3.7,6.0)  | 379        | 15.4 | (13.2,18.5)   | 44       | 9.7   | (6.8,11.4)   |
|                          | 40-65          |          | 2192    | 5.6  | (5.0,6.3)   | 1310    | 4.2  | (3.6,4.6)  | 665        | 11.2 | (10.1,12.5)   | 217      | 2.2   | (-2.6,4.8)   |
|                          | >65            |          | 568     | 1.4  | (0.5,2.0)   | 481     | 0.9  | (0.2,1.8)  | 80         | 4.5  | 4.5 (1.9,7.9) | 7        | -16.3 | (-36.3,6.2)  |
| Female                   | Yes            | CKD-EPI  | 1767    | 2.2  | (1.5,3.0)   | 780     | 1.6  | (1.0,2.1)  | 509        | 5.8  | (3.8,8.0)     | 478      | 0.4   | (-1.9,2.6)   |
|                          | No             |          | 2129    | 2.2  | (1.7,2.6)   | 1122    | 2.1  | (1.5,2.4)  | 481        | 3.1  | (1.6,4.6)     | 526      | 1.6   | (-0.9,4.2)   |
|                          | Yes            | MDRD     | 1767    | 6.4  | (5.6,7.7)   | 880     | 4.2  | (3.3,4.6)  | 562        | 13.4 | (11.8,15.8)   | 325      | 6.9   | (4.1,9.3)    |
|                          | No             |          | 2129    | 4.8  | (4.1,5.3)   | 1220    | 2.9  | (2.5,3.6)  | 562        | 10.8 | (9.6,12.2)    | 347      | 6.0   | (3.2,10.4)   |
| Race                     | Black          | CKD-EPI  | 384     | -1.1 | (-2.3,0.5)  | 220     | 0.5  | (-0.9,1.9) | 69         | 3.4  | (-4.0,6.5)    | 95       | -13.2 | (-20.2,-7.6) |
|                          | White or other |          | 3512    | 2.5  | (2.1,2.9)   | 1682    | 2.0  | (1.6,2.4)  | 921        | 4.4  | (3.2,5.8)     | 909      | 2.4   | (0.4,4.3)    |
|                          | Black          | MDRD     | 384     | 0.3  | (-1.1,1.6)  | 222     | 0.2  | (-1.1,1.5) | 83         | 7.9  | (4.1,10.8)    | 79       | -8.3  | (-15.5,-1.9) |
|                          | White or other |          | 3512    | 6.0  | (5.4,6.6)   | 1878    | 3.9  | (3.4,4.3)  | 1041       | 12.2 | (11.3,14.0)   | 593      | 8.8   | (5.9,10.8)   |
| Diabetes                 | Yes            | CKD-EPI  | 1089    | 4.6  | (3.9,5.5)   | 553     | 2.6  | (1.9,3.8)  | 204        | 4.0  | (1.9,5.9)     | 332      | 12.3  | (10.9,14.5)  |
|                          | No             |          | 2807    | 1.3  | (0.9,1.9)   | 1349    | 1.6  | (1.1,2.1)  | 786        | 4.4  | (3.2,6.0)     | 672      | -3.3  | (-5.1,-2.1)  |
|                          | Yes            | MDRD     | 1089    | 8.1  | (6.7,9.0)   | 601     | 4.6  | (3.5,5.3)  | 235        | 15.3 | (11.7,20.3)   | 253      | 19.1  | (14.9,23.5)  |
|                          | No             |          | 2807    | 4.6  | (4.2,5.1)   | 1499    | 3.0  | (2.5,3.6)  | 889        | 11.5 | (10.6,12.6)   | 419      | 0.4   | (-2.2,2.6)   |
| Transplant               | Yes            | CKD-EPI  | 1134    | 1.5  | (0.7,2.2)   | 731     | 2.6  | (2.1,4.0)  | 311        | -1.2 | (-3.5,0.7)    | 92       | -10.0 | (-13.5,-3.7) |
|                          | No             |          | 2762    | 2.5  | (2.0,3.0)   | 1171    | 1.4  | (1.0,1.9)  | 679        | 7.6  | (5.8,8.8)     | 912      | 2.2   | (0.3,4.2)    |
|                          | Yes            | MDRD     | 1134    | 4.8  | (3.9,5.5)   | 840     | 5.1  | (4.2,6.0)  | 241        | 3.9  | (0.6,6.1)     | 53       | -5.6  | (-14.3,3.4)  |
|                          | No             |          | 2762    | 5.8  | (5.2,6.4)   | 1260    | 2.6  | (2.1,3.1)  | 883        | 14.5 | (12.8,15.7)   | 619      | 7.2   | (4.8,10.0)   |
| BMI (kg/m <sup>2</sup> ) | <20            | CKD-EPI  | 249     | -3.5 | (-4.7,-1.6) | 120     | -1.7 | (-4.1,0.0) | 73         | -1.2 | (-4.3,3.4)    | 56       | -16.6 | (-22.9,-8.4) |
|                          | 20-25          |          | 1357    | 2.2  | (1.5,3.0)   | 589     | 1.7  | (1.1,2.4)  | 341        | 4.5  | (2.5,7.0)     | 427      | 1.5   | (-1.2,4.5)   |
|                          | 26-30          |          | 1339    | 3.2  | (2.4,3.9)   | 643     | 2.3  | (1.7,3.0)  | 350        | 4.9  | (3.6,7.2)     | 346      | 5.2   | (0.9,8.1)    |
|                          | >30            |          | 951     | 2.1  | (1.1,2.8)   | 550     | 2.1  | (1.1,2.8)  | 226        | 3.9  | (1.2,5.7)     | 175      | -0.9  | (-4.0,2.1)   |
|                          | <20            | MDRD     | 249     | 0.6  | (-1.5,2.1)  | 139     | 0.1  | (-1.7,1.3) | 74         | 7.4  | (3.0,12.1)    | 36       | -13.7 | (-21.8,-8.4) |
|                          | 20-25          |          | 1357    | 5.9  | (5.2,6.5)   | 656     | 4.1  | (3.1,4.6)  | 408        | 12.2 | (9.7,15.1)    | 293      | 6.8   | (3.4,11.0)   |
|                          | 26-30          |          | 1339    | 6.7  | (5.7,7.8)   | 705     | 3.7  | (2.9,4.5)  | 412        | 13.4 | (11.9,15.5)   | 222      | 9.9   | (5.8,12.6)   |
|                          | >30            |          | 951     | 4.4  | (3.6,5.3)   | 600     | 3.2  | (2.2,4.2)  | 230        | 10.3 | (8.1,12.6)    | 121      | 6.3   | (-1.2,10.3)  |

Note: Bias is calculated as mGFR – eGFR, where mGFR is measured GFR. GFR expressed in ml/min/1.73 m<sup>2</sup>; factor for conversion to ml/s/1.73 m<sup>2</sup>, x0.01667. Abbreviations: BMI, Body mass index; CI, confidence interval; CKD-EPI, Chronic Kidney Disease Epidemiology Collaboration; eGFR, estimated glomerular filtration rate; MDRD, Modification of Diet in Renal Disease.
