# Supplementary material
Source: PubMed Central journal article supplement (PMC2926290)
Supplement: NIHMS200970-supplement-03.pdf [file NIHMS200970-supplement-03.pdf]

**Table S3:** Comparison of percentage bias of the CKD-EPI and MDRD Study equations by clinical characteristics subgroups

| Group                    |                | Equation | Overall |        |              | eGFR<60 |        |             | eGFR 60-90 |        |             | eGFR >90 |        |              |
|--------------------------|----------------|----------|---------|--------|--------------|---------|--------|-------------|------------|--------|-------------|----------|--------|--------------|
|                          |                |          | N       | % Bias | CI           | N       | % Bias | CI          | N          | % Bias | CI          | N        | % Bias | CI           |
| Overall                  |                | CKD-EPI  | 3896    | 4.4    | (3.7,5.1)    | 1902    | 5.6    | (4.4,6.6)   | 990        | 5.6    | (4.1,6.9)   | 1004     | 0.8    | (-0.7,2.5)   |
|                          |                | MDRD     | 3896    | 10.3   | (9.7,11.1)   | 2100    | 9.6    | (8.5,10.6)  | 1124       | 14.3   | (12.9,15.3) | 672      | 5.7    | (4.1,7.6)    |
| Age                      | <40            | CKD-EPI  | 1136    | 3.4    | (1.4,4.6)    | 256     | 4.1    | (0.9,6.7)   | 260        | 6.4    | (3.6,9.6)   | 620      | 0.8    | (-1.3,3.8)   |
|                          | 40-65          |          | 2192    | 5.1    | (4.2,6.0)    | 1170    | 6.3    | (5.0,7.7)   | 645        | 5.9    | (4.3,7.3)   | 377      | 1.0    | (-1.2,2.5)   |
|                          | >65            |          | 568     | 3.7    | (1.3,6.1)    | 476     | 4.3    | (2.0,6.7)   | 85         | 1.0    | (-2.6,7.5)  | 7        | 0.6    | (-58.6,14.5) |
|                          | <40            | MDRD     | 1136    | 12.5   | (11.2,14.0)  | 309     | 13.0   | (10.6,15.2) | 379        | 17.1   | (15.3,19.7) | 44       | 7.8    | (5.9,9.9)    |
|                          | 40-65          |          | 2192    | 11.1   | (10.0,11.8)  | 1310    | 11.1   | (9.6,12.1)  | 665        | 13.1   | (11.8,14.9) | 217      | 2.2    | (-2.6,4.6)   |
|                          | >65            |          | 568     | 3.8    | (1.9,5.7)    | 481     | 3.3    | (0.8,5.7)   | 80         | 5.9    | (2.4,9.7)   | 7        | -19.8  | (-64.8,5.7)  |
| Female                   | Yes            | CKD-EPI  | 1767    | 4.3    | (3.1,5.6)    | 780     | 5.0    | (2.8,7.1)   | 509        | 7.3    | (5.0,9.9)   | 478      | 0.4    | (-1.7,2.5)   |
|                          | No             |          | 2129    | 4.4    | (3.4,5.4)    | 1122    | 5.9    | (4.4,7.2)   | 481        | 4.0    | (2.1,5.8)   | 526      | 1.6    | (-0.8,3.9)   |
|                          | Yes            | MDRD     | 1767    | 11.6   | (10.4,12.6)  | 880     | 11.4   | (9.4,12.8)  | 562        | 15.4   | (13.9,17.9) | 325      | 5.7    | (3.8,8.1)    |
|                          | No             |          | 2129    | 9.6    | (8.6,10.4)   | 1220    | 8.5    | (7.2,9.9)   | 562        | 12.7   | (11.2,14.6) | 347      | 5.7    | (3.0,9.0)    |
| Race                     | Black          | CKD-EPI  | 384     | -3.0   | (-4.6,1.1)   | 220     | 1.7    | (-3.5,6.1)  | 69         | 4.5    | (-5.7,7.1)  | 95       | -12.5  | (-19.4,-6.7) |
|                          | White or other |          | 3512    | 4.9    | (4.2,5.8)    | 1682    | 6.0    | (4.7,7.1)   | 921        | 5.8    | (4.1,7.3)   | 909      | 2.4    | (0.4,4.0)    |
|                          | Black          | MDRD     | 384     | 0.6    | (-2.0,4.1)   | 222     | 0.6    | (-3.6,4.3)  | 83         | 9.4    | (5.1,12.1)  | 79       | -6.9   | (-14.3,-1.5) |
|                          | White or other |          | 3512    | 11.1   | (10.4,11.9)  | 1878    | 10.2   | (9.3,11.4)  | 1041       | 14.8   | (13.3,15.6) | 593      | 7.6    | (5.1,9.3)    |
| Diabetes                 | Yes            | CKD-EPI  | 1089    | 4.6    | (3.9,5.5)    | 553     | 7.1    | (5.5,9.3)   | 204        | 5.2    | (2.6,7.9)   | 332      | 10.3   | (8.5,11.6)   |
|                          | No             |          | 2807    | 2.7    | (1.8,3.8)    | 1349    | 4.8    | (3.4,6.2)   | 786        | 5.7    | (4.0,7.4)   | 672      | -3.3   | (-4.8,-2.0)  |
|                          | Yes            | MDRD     | 1089    | 13.0   | (11.8,14.7)  | 601     | 11.0   | (9.2,12.9)  | 235        | 17.4   | (14.2,21.1) | 253      | 14.9   | (11.5,17.4)  |
|                          | No             |          | 2807    | 9.2    | (8.4,10.1)   | 1499    | 9.0    | (7.7,10.1)  | 889        | 13.4   | (12.2,14.7) | 419      | 0.4    | (-2.2,2.5)   |
| Transplant               | Yes            | CKD-EPI  | 1134    | 3.1    | (1.4,4.5)    | 731     | 6.7    | (4.8,8.9)   | 311        | -1.8   | (-4.9,1.0)  | 92       | -11.8  | (-14.9,-3.5) |
|                          | No             |          | 2762    | 4.9    | (4.1,5.8)    | 1171    | 4.8    | (3.3,6.2)   | 679        | 8.8    | (6.9,10.5)  | 912      | 2.1    | (0.3,3.8)    |
|                          | Yes            | MDRD     | 1134    | 9.4    | (8.1,11.2)   | 840     | 11.7   | (9.9,13.1)  | 241        | 5.5    | (0.9,8.7)   | 53       | -6.1   | (-12.3,3.5)  |
|                          | No             |          | 2762    | 10.7   | (9.9,11.4)   | 1260    | 8.4    | (7.0,9.7)   | 883        | 16.0   | (15.2,17.6) | 619      | 6.4    | (4.5,8.5)    |
| BMI (kg/m <sup>2</sup> ) | <20            | CKD-EPI  | 249     | -6.8   | (-10.0,-3.3) | 120     | -6.3   | (-11.8,0.2) | 73         | -1.9   | (-6.9,3.8)  | 56       | -18.1  | (-25.0,-8.8) |
|                          | 20-25          |          | 1357    | 4.2    | (2.9,5.0)    | 589     | 4.9    | (2.9,7.0)   | 341        | 5.7    | (3.6,8.8)   | 427      | 1.5    | (-1.3,4.2)   |
|                          | 26-30          |          | 1339    | 6.3    | (5.3,7.9)    | 643     | 7.1    | (5.1,9.1)   | 350        | 6.7    | (4.5,9.2)   | 346      | 4.4    | (0.9,7.7)    |
|                          | >30            |          | 951     | 4.4    | (2.4,5.8)    | 550     | 6.1    | (4.0,8.1)   | 226        | 5.1    | (1.8,7.1)   | 175      | -0.7   | (-3.8,1.7)   |
|                          | <20            | MDRD     | 249     | 1.0    | (-3.2,4.5)   | 139     | 0.3    | (-4.2,4.5)  | 74         | 8.9    | (3.8,14.3)  | 36       | -14.0  | (-23.6,-6.7) |
|                          | 20-25          |          | 1357    | 10.7   | (9.4,11.8)   | 656     | 10.6   | (8.7,12.0)  | 408        | 14.2   | (11.2,16.3) | 293      | 6.4    | (3.4,9.3)    |
|                          | 26-30          |          | 1339    | 12.0   | (10.8,13.0)  | 705     | 9.9    | (8.5,12.0)  | 412        | 15.4   | (14.1,17.8) | 222      | 8.1    | (4.9,10.7)   |
|                          | >30            |          | 951     | 9.6    | (8.0,10.7)   | 600     | 9.6    | (7.3,11.2)  | 230        | 12.4   | (9.9,14.8)  | 121      | 5.3    | (-1.3,8.1)   |

Note: Percent bias (% Bias) is calculated as  $100 \times (\text{mGFR} - \text{eGFR})/\text{mGFR}$ . GFR expressed in ml/min/1.73 m<sup>2</sup>; factor for conversion to ml/s/1.73 m<sup>2</sup>,  $\times 0.01667$ .

Abbreviations: BMI, Body mass index; CI, confidence interval; CKD-EPI, Chronic Kidney Disease Epidemiology Collaboration; eGFR, estimated glomerular filtration rate; MDRD, Modification of Diet in Renal Disease.
